# Supplementary material
Source: Springer Nature journal article supplement (https://www.springermedizin.de/resource/supplementary/12885_2012_3425_MOESM6_ESM.pdf/9462868)

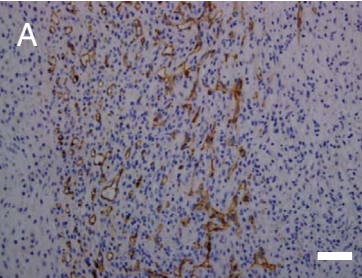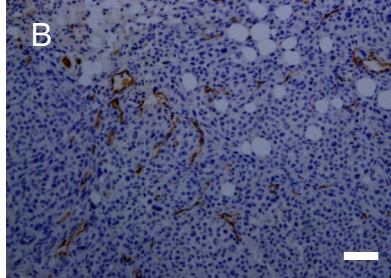

**C.**

Microvessel density

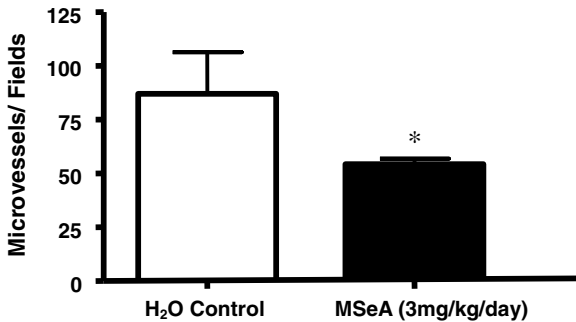

Supplement: MOESM6 [file 9462868]
